# Supplementary material for: Toward Generalized Milankovitch Theory (GMT)
Source: Copernicus journal article supplement (doi:10.5194/cp-2023-57), 2023-07-11
Supplement: Supplementary file [file cp-2023-57-AC1-supplement.pdf]

## Response to comments by Michel Crucifix (Referee #1)

I thank the Referee for the useful and constructive comments and suggestions. Below is my response with the original Referee's comments in blue italic.

### General comments

5 *It is relevant to consider the science reviewed in the present contribution as a development of Milankovitch's effort, because Milankovitch's purpose was to provide a theory of ice ages. Yet, I would argue, this is not the only possible way of 'generalizing' Milankovitch's theory. For example, a stream of modern research is focused on understanding orbital control of climate for other periods in the past, down to the Paleozoic. This other form of generalisation would give more importance to other climatic and environmental effects of the orbital forcing than their effects on ice sheets, such as ocean circulation and nutrient supply. Therefore, I would suggest to be a bit more explicit about the Quaternary ice ages in the title (see suggestion below).*

As will be explained below, the Milankovitch theory has nothing to do with the climates of the Phanerozoic or any other period. It will be also explained why I do not like the term "Quaternary ice ages".

*The word 'theory' is used in the present contribution to designate the ensemble of theoretical and empirical considerations that leads to our current understanding of the astronomical control on ice ages. The "theory" is illustrated by the "Model 3" conceptual model. The latter has obvious similarities with previously published models (especially from the Paillard's school) but the author explains that it is formulated such as to be compatible with CLIMBER-2 output, along with general considerations about the bi-stability of ice sheets at the global level. The key point, here, is that the "Model 3" does not explicitly introduces a 80ka time scale as Paillard 99 did, which in effect, puts more responsibility on the succession of precession cycles, modulated on eccentricity, to generate the 100ka signal. This definitely is an interesting point, and in that sense I can see why the author presents this work as a 'generalisation' of Milankovitch's theory. Model 3 features a dynamics that wasn't in the original Milankovitch proposal.*

(I suppose the Referee means here and hereafter Paillard 98, not Paillard 99). I've got the impression that the Referee assumes that Model 3 is the GMT. It is not. The GMT is described in section 5: "Elements of GMT". To prevent such confusion, I will remove "GMT" from the title of Section 4, which describes Model 3.

30 *Yet, let us admit, many authors of models and theories over the last 3 decades have introduced a dynamical component, and in that sense generalize Milankovitch's theory.*

I acknowledged the important contributions of many authors toward the development of a comprehensive theory of glacial cycles. The paper refers to more than 100 publications of other authors. I do not claim that I am the first to try to "generalize" Milankovitch theory, i.e. to advance it beyond the classical Milankovitch theory to explain facts which were not known during the Milankovitch era. But I also believe that I advanced in this direction further than my fellow colleagues. Moreover, I have a "copyright" on the term GMT. I am not sure whether the Reviewer is aware of this fact, but I introduced this term in my Milankovitch Medal Lecture at EGU 12 years ago:

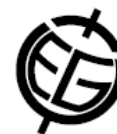

## Towards Generalized Milankovitch Theory (Milutin Milankovic Medal Lecture)

Andrey Ganopolski  
Potsdam Institute for Climate Impact Research, Potsdam, Germany

40 In this lecture, the abstract of which is readily available, I already formulated a number of key elements of the GMT. In particular:

*(i) the glacial cycles represent a direct, strongly nonlinear response of the climate-cryosphere system to the orbital forcing; (ii) the strong 100 kyr cyclicity of ice volume variations originates from phase locking of the "long" glacial cycles to the eccentricity variations with 100 kyr periodicity, etc...*

45 I delayed the publication of this paper for such a long time because I wanted first to test my ideas with the results of the CLIMBER-2 model. This took a while and was accomplished by the publication of Ganopolski and Brovkin (2017) and Willeit et al. (2019). Now, some of the earlier findings are also corroborated with the new CLIMBER-X model.

50 *Furthermore, as I will discuss below, there are still some uncomfortable theoretical hurdles. For example, the linear relationship the derivative of ice volume (in m<sup>3</sup>/s) and the orbital forcing (in W/m<sup>2</sup>) is not straightforward to explain from the theory of ice sheets.*

The Referee here challenges my Model 2, which is described in Appendix A4, and contrasts it with the theoretically derived model described in Verbitsky et al. (2018) (hereafter V18), and not in my favour. I had the privilege to discuss the V18 paper on several occasions with the first author, Michail Verbitsky, and I know this work well. However, I do not believe that the governing equations of this model are derived from theory and not just postulated. Being heavily involved in the modelling of ice sheets and climate-ice sheet interaction over the past 20 years, I am not aware of the existence of any "theory of ice sheets" which can be used to derive a single equation describing the mass balance of all ice sheets on the planet (or even just a single one). The complexity of the problem is demonstrated in Fig. 1, which depicts the mean annual surface mass balance of the northern ice sheets at 25 ka and 15 ka. A short glance at this figure is sufficient to recognize that there is no simple relationship between surface melting and the area of ice sheets. In the real world, the melting occurs only over a narrow ablation zone, which usually occupies a small fraction of the total area of ice sheets, but the ablation area rapidly expands during critically important parts of glacial cycles – glacial terminations, as shown in Fig. 1 below.

65

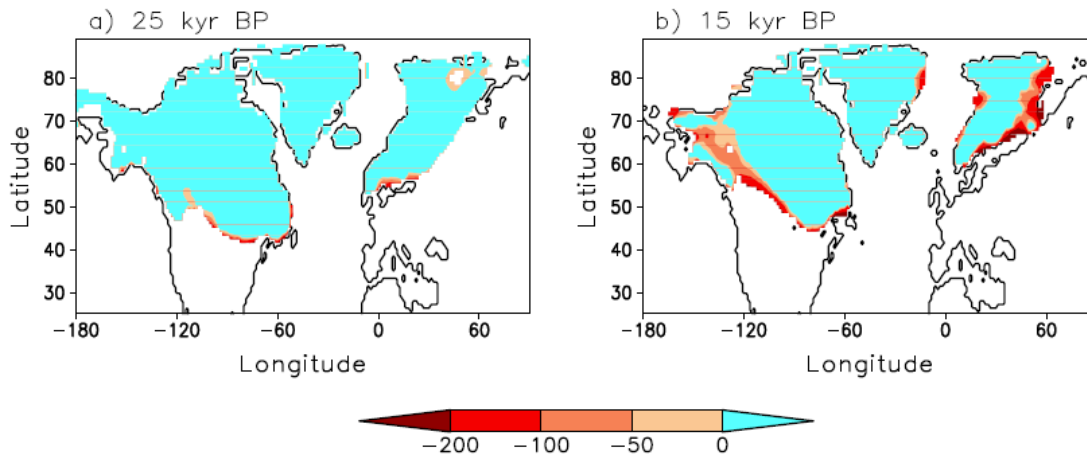

**Fig. 1.** Surface mass balance in cm/yr at 25 ka (left) and 15 ka (right) from the ONE\_1.0 experiment with the CLIMBER-2 model (Ganopolski and Brovkin, 2017).

My approach is fundamentally different from V18. When developing Model 2, I did not try to derive  
 70 model equations from the “first” principles. Instead, I choose the simplest possible equation which  
 allowed me to reproduce main CLIMBER-2 results, first of all, its stability diagram in the phase space of  
 orbital forcing, which is characterized by multiple equilibria and bifurcation transitions (Fig. 1 in Calov  
 and Ganopolski, 2005). Note that a very similar stability diagram was reported by Abe-Ouchi et al.  
 (2013). Assuming that the ice area is proportional to ice volume (the correctness of this assumption is  
 75 described below), a simple equation for ice volume evolution can be written in the form (Appendix A4):

$$\frac{dv}{dt} = av - bv^2 - cf,$$

where  $v$  is ice volume and  $f$  is orbital forcing. Again, unlike V18, I extensively tested this equation against  
 the CLIMBER-2 result (see Fig. 2 below), and the results were quite satisfactory. In particular, a linear  
 80 relationship between ablation and orbital forcing works well, which is not surprising because the  
 correlation between total surface mass balance and orbital forcing is 0.8. Admittedly, the linear  
 relationship between the derivative of ice volume and the orbital forcing is not my invention - it was  
 used, for example, in P98 model.

*In summary, I would concede that it is adequate to use the word "theory" in the title but I would be more  
 85 explicit about the focus on Quaternary glacial cycles and on the fact that this contribution is part of a  
 long-term development.*

These issues I already addressed above.

Here is my proposal:

*A proposal: "steps towards generalizing the Milankovitch theory of Quaternary ice ages"*

Below I explain why I cannot agree with this proposal.

90 *I leave it with the editor, based on the comments of the other reviewers.*

Concerning the Referee's suggestion to change the title to "*steps towards generalizing the Milankovitch theory of Quaternary ice ages*". Unfortunately, the suggested title does not correctly represent the essence and significance of my paper.

95 First, about "steps toward generalizing". In my manuscript, whether the Referee likes this or not, I present not some steps towards generalizing, but the Generalized Milankovitch Theory. Obviously, the Referee does not place me in the cohort of Titans which are allowed (without any "steps" and "toward") to use such ambitious terminology as "Generalized theory", "Unified theory" or "the global theory" (these are the subtitle of the book and, the titles of Section 3 and Chapter 14 correspondingly of Saltzman's "Dynamical Paleoclimatology"). Still, I believe that the choice of the title in this special case  
100 (medallist paper), the choice of the title of the manuscript is the prerogative of the author.

Concerning the Referee's suggestion to specify the name of the theory, namely, "Milankovitch theory of Quaternary ice ages". Firstly, such a term does not exist. Google Scholar found zero matches for this term, and Google found only two, but, ironically, the first match is my GMT paper, which does not contain such a term.

105 Secondly, the term "Quaternary ice ages" is anachronism. While "ice ages" were considered relatively short climate events during the Milankovitch times, we now know that the Quaternary is essentially a continuous "ice age" with short interruptions.

Thirdly, GMT is the general theory of glacial cycles, not only Quaternary glacial cycles. Glacial cycles began before the Quaternary (2.55 Ma), but what is even more important, GMT is also applicable to the future -both "natural" and Anthropogenic (Archer and Ganopolski, 2005; Ganopolski et al., 2016; Talento and Ganopolski, 2020). Thus, GMT is not a "Quaternary theory".  
110

And last but not least. Do we really need a clarification for the "Milankovitch theory"? Such respected authors like A. Berger, J. Imbrie and D. Paillard used the term "Milankovitch theory" without any additional clarifications. Such a clarification would only be needed if this term is ambiguous, in other  
115 words, if there is not one but several different Milankovitch theories. Of course, Milankovitch's contribution to science is not restricted to glacial cycles, and André Berger in his recent paper even named Milankovitch "the father of paleoclimate modelling". It is also true that Milankovitch had much more serious ambitions than just solving the "ice age problem". The title of Part V of the Canon (in English translation) contains "The mathematical climate of the Earth". However, to everybody who really  
120 read Canon, it is obvious that the knowledge about climate processes during the Milankovitch era was absolutely insufficient for the development of the theory of climate. The real theory of climate began to be developed only with the advent of powerful computers and other modern technologies in the 1960s. At the same time, Milankovitch indeed made an important contribution to the understanding of glacial cycles. Not only did he clearly formulate the problem and choose the right forcing, but he also  
125 developed a simple model which accounted for the key climate feedbacks and used this model to test the hypothesis about the astronomical origin of glacial cycles. He even made an attempt to validate his modeling results against geological data available at that time. Thus, the name "Milankovitch theory" is well deserved, but there is only one Milankovitch theory – the theory of glacial cycles.

130 **Line by line comments**

*p. 2: 50: "The comprehensive theory cannot be simple". It is a nice punchy sentence but perhaps a bit tautological.*

135 Yes, this was an ironic statement addressed to colleagues who believe that glacial cycles can be explained by one or two ordinary differential equations. The author would be happy to remove this sentence.

140 *In fact, can we ever have 'a' general comprehensive theory of ice ages? Perhaps this would be similar to ask for a general theory of the blood circulation. One can convincingly sketch the general idea (this is one objective of "Model 3"), and then go into endless details about the dynamics of fluids, chemistry, function and shape of heart etc. There will never be "one" theory because we speak about a complex system, which can be attacked from many angles.*

145 Concerning (im)possibility to develop a theory of complex systems. Admittedly, I know nothing about blood circulation. However, I do know that in other scientific disciplines, there are many generally accepted theories, such as general relativity theory in physics, valence bond theory in chemistry, theory of evolution in biology, plate tectonic theory in geology, etc. What is so special about climate science, and why does the Referee think that it is impossible to develop a theory of glacial cycles which will be comprehensive and (eventually) generally accepted?

150 The correct theory, even if it is not yet comprehensive, is very useful (and the wrong theories will die out on their own). We already do have one nearly generally accepted theory of glacial cycles – the Milankovitch theory. Just imagine that this theory would not exist, and we would not have a clue of what drives glacial cycles. Where would we be now in understanding past climate changes if the present-day orbital parameters of Earth's orbit would be fixed in program codes as was the case in the first generations of climate models?

155 Now, a few words about complexity. The author is well aware of the complexity of the Earth system as he devoted most of his 40-years scientific career to modelling the Earth system in general, and glacial cycles in particular. However, complexity is not an obstacle but rather the stimulus for developing a comprehensive theory. The task of the theory is to provide a general framework (concept) useful for understanding the observed (past) phenomena and predicting new (future) ones. To deal with the full complexity of the Earth system, we have Earth system models (EMICs and complex GCM-based ESMs).  
160 Significant progress in modelling and understanding glacial cycles has already been achieved with EMICs (i.e. Ganopolski and Brovkin, 2017; Willet et al. 2019). Now, the turn is for complex ESMs.

Where I really see a problem related to the complexity of the Earth system is in deriving simple models from 3D equations describing the dynamics of climate, ice sheets and their interactions.

165 *My suggestion (first draft): "Despite significant progress in understanding climate dynamics and [...] glacial cycles, questions have remained about the mechanism of importance of glacial dynamics, carbon cycle, and scaling relationships between different variables,*

I am not sure what "mechanism of importance" means; possibly this is a typo, but the importance of ice sheet dynamics and climate-carbon cycle feedbacks for glacial cycles is generally acknowledged, and a few remaining issues which are not yet fully understood are extensively discussed in my manuscript. As

170 far as “scaling relationships” are concerned, this is not a part of GMT, and I suspect that this issue is of interest only to a small cohort of mathematical climatologists.

*and how they concurred to synchronise glacial cycles on short eccentricity cycles.*

The GMT gives the answer to this question.

*These are the targets for progressing towards better theories of glacial cycles.*

175 Unfortunately, I do not understand what “better” means in this context and why “theories” are in plural form? Does the Referee believe that we need several alternative theories of glacial cycles? I think that one correct theory would be enough.

Action: I will add a sentence addressing the remaining question formulated by the Referee.

180 *Somewhere in the text I would also see adequate to pay some tribute to the visionary paper by MacAyael 1979.*

The MacAyael (1979) paper will be cited.

*I. 125, typo (starting with ".")*

Will be fixed

185 *Section 3.2 : Perhaps this is a place to note a difference of status between different forms of low-order models. Paillard 1999 is clearly "inductive" in the sense that the existence of three states, plus the associated time scales, emanate from inspection of the data. Paillard 1999 summarises what he sees in the form of a small model, and then draws the consequences of it. Verbitsky et al. 2018 start from theoretical considerations about glacial scaling laws and deduces the ice volume trajectory, with obviously a bit of (reasonable) fine tuning. Saltzman's work from the late eighties /early nineties are*  
190 *somewhere in between, depending on how one looks at it. These different models have different functions, all useful, in the construction of our understanding of the astronomical control of ice ages.*

(Again, it should be Paillard 1998). I agree that it makes sense to make a distinction between purely inductive and partially inductive conceptual models of glacial cycles. This will be done in the revised version of the manuscript.

195 *I. 296: the word "massive" may be unnecessary.*

Agreed, “massive” will be removed.

*II. 320 - 322 : CLIMBER-2 itself was tuned; it implicitly includes observations, in that sense it is not quite certain that CLIMBER-derived constraints should be considered as fully independent.*

200 I agree with the Referee that “independent” is not the right word in this context, and it will be removed. What is meant here is that Model 3 formally contains five “tunable” parameters, which is a bit too much for such a type of model aimed at reproducing a single wiggly curve. However, three of these parameters ( $f_1$ ,  $t_1$  and  $t_2$ ) can be directly derived from a combination of paleodata and CLIMBER-2 results with reasonable accuracy. Thus, only two tunable parameters remain.

205 *I. 404: "erasing the memory". this is correct, but the phenomenon is already implicitly there in MacAyael 1979.*

The MacAyeal paper will be cited. Again, I didn't claim that GMT is based solely on my own ideas.

*I. 449: "Model 3 represents" -> "Model 3 is"*

The sentence will be modified

*I. 481: The author may also consider a reference to the Huybers - Tziperman 2008 paper.*

210 As will be discussed below, this paper is based on erroneous approach. This is why it will not be cited. It is enough that original Huybers 2006 paper is cited.

215 *I. 605: I must admit having been unconvinced about the "Quantum tunnel" analogy (in which case the potential barrier is crossed by a form of delocalisation). For the modelling of ice ages, the basic limitation of the potential barrier image is that it is 1-dimensional, while the dynamics for the relaxation imply at least another degree of freedom. This is not what happens in quantum dynamics. I leave the author with these considerations without any intention to fight on this point.*

220 Of course, any analogy, especially analogy with quantum mechanics, is limited. I use this analogy to stress the fact that glacial termination ("catastrophe") in my models is not related to the crossing of bifurcation point (B2 in Fig. 4). Presently, there is a widespread misunderstanding (both in mass culture and science) that crossing of a bifurcation point ("tipping point") should lead to an imminent catastrophe. By using an analogy with the tunnel effect, I want to demonstrate that glacial termination is a completely different type of instability than that associated for example with Stommel's model of thermohaline circulation or Budyko's temperature hysteresis.

225 *II. 650 - 655 : Basal sliding related to thermal balance (as encoded by Verbitsky et al. 2018) is another potentially important mechanism not mentioned here. From informal conversations with glaciologists, I understand that this is a very plausible, major ingredient for the deglaciation catastrophe.*

230 The Referee is mistaken: the role of basal sliding is not only discussed (L. 631) as part of the domino effect but it is also depicted in Fig. 13a by a big blue arrow ("fast sliding"). And, of course, basal sliding only occurs "when the temperature at the base of ice sheets reaches the pressure melting point" (L. 802). However, basal sliding is not a specific feature of deglaciations. As shown in Ganopolski et al. (2010) (Fig. 6c), during most of the last glacial cycle, 20-30% of the ice sheet base was at the pressure melting point and thus was sliding. However, it makes a big difference whether sliding occurs over a hard bed (rocks) or soft bed (sediments), because "the thick terrestrial sediments make ice sheets more mobile since temperate ice (ice at the pressure melting point) moves much faster over sediments than over bare rocks" (L. 743). This is why, only when the northern ice sheets prior to LGM spread over large areas covered by unconsolidated sediments, basal sliding becomes an important factor affecting ice sheet stability. Of course, there are several other mechanisms which likely also contributed to the "deglaciation catastrophe", such as marine ice sheet instability and "proglacial lakes ice sheet instability", which are also discussed in sub-section 5.5 Glacial terminations: the domino effect.

240 *p. 24 before section 5.8: The author may consider adequate to mention already at this point the Paillard-Bouttes theory about sequestration and release of carbon due to change in the formation of AABW (it is alluded to later in the text, admittedly).*

245 The importance of enhanced AABW formation due to brine rejection and its impact on carbon sequestration in the glacial ocean was discussed already in Brovkin et al. (2007), i.e. two years before the first Bouttes et al. paper. This is the citation from Brovkin et al. (2007): "Enhanced formation and

increased density of AABW water masses is primarily caused by more extensive sea ice formation with associated brine rejection around Antarctica” (PA4202). The difference between our modelling results and “Paillard-Bouttes theory” is that, in our version of the CLIMBER-2 model, brines are effectively mixed with the surrounding water masses, while Bouttes and co-authors used the same model but proposed that most of the brines arrive into the deep ocean without mixing. As an expert in ocean modelling, I was always sceptical about the realism of such an assumption. Nonetheless, in Ganopolski and Brovkin (2017) we tested the mechanism proposed by Bouttes and co-authors and concluded that the assumption about the penetration of a large fraction (>50%) of brines into the deep glacial ocean leads to results incompatible with proxy data.

*p. 26 ll. 820 - 824 : regolith over CO2. Fair point, but pre-800 ka CO2 estimates remain uncertain, especially that one needs a trend over the mean state (set by the balance between outgassing and weathering), which may differ from what individual glacial or interglacials estimate.*

I fully agree with the Referee that pre-ice core reconstructions of CO2 concentration are not as reliable as ice core data, but I cannot see how this fact contradicts to what is written in the manuscript: “*there is no strong evidence for the decline of CO2 level directly prior to the MPT (Hönisch et al., 2009; Chalk et al., 2017; Yamamoto et al., 2022)*”.

*l. 866 : The long interglacials indeed bring an interesting constrain in the decision between 'self-sustained' vs 'driven' constraints and this section is relevant. However, what model simulations give in this respect (l. 867) may bring a tautological argument, especially when it comes for future climate simulations because the anthropogenic CO2 emissions would have broken the self-sustained oscillation, if there was one, anyway.*

I agree that the last sentence of the paragraph can be interpreted in a way that a future extra-long interglacial disproves the mechanism of self-sustained oscillations. Of course, we do not have data from the future. The idea was to say that the mechanisms of forced and self-sustained oscillations have very different implications for future glacial cycles. This sentence will be modified accordingly.

*sect. 5.11 : The discussion in this paragraph is reasonable, but I would like to use this opportunity to clarify one point. Several models with self-sustained oscillations have indeed sensitive dependence on parameters and/or additive stochastic noise, in the sense that certain terminations may be triggered one precession cycle in advance, or delayed, delaying the whole sequence. Mathematically, this indeed occurs as a manifestation of 'non-chaotic strange attractors' (Mitsui and Aihara, 2014; Crucifix, 2013). But in all cases, these models do not display sensitive dependence to \_initial conditions\_. I agree that the surprising efficiency of 'simple rules' suggest that the timing of deglaciations is less sensitive to details or stochastic elements than these models may suggest, but on the other hand, I observe that the catastrophic character of some deglaciations (especially termination V) is hard to capture by those models which are the most well-behaved (like CLIMBER). So we have to explain a paradox here: On the one hand terminations would be highly catastrophic (which indeed suggest a domino effect, in essence very sensitive to an initial trigger), and on the other hand their timing would be very robustly set by the astronomical forcing.*

The Reviewer mixed here predictability with model performance, which are different things. For example, many GCMs still simulate spurious double ITCZ, but this does not mean that the correct seasonal evolution of ITCZ is, in principle, “unpredictable”. Similarly, the fact that in one of four runs, the “well-behaved” CLIMBER-2 with interactive CO2 (Willeit et al., 2019) failed to simulate complete



deglaciation during Termination V, does not imply that Termination V is “unpredictable”. It only means that a weak orbital forcing at the time of Termination V is too weak for a given model to trigger deglaciation in 100% of cases. CLIMBER-2 is the first earth system model which simulates glacial cycles with interactive CO<sub>2</sub> and ice sheets. I am sure future models will be even better, and the problem of Termination 5 will be gone. It is also noteworthy that even in the single CLIMBER-2 run, where Termination V wasn’t completed, the next glacial termination (TIV) was successfully simulated. Thus, a single model failure does not prevent successful simulations of the next glacial cycles, and this is despite the fact that CLIMBER-2 simulate strong internal (random) variability associated with millennial-scale AMOC transitions and Heinrich-type ice surging events (Ganopolski et al., 2010). Thus, CLIMBER-2 results strongly suggest that glacial cycles are mostly deterministic and thus predictable. This is related to the fact that, according to GMT, glacial cycles of the last 1Ma are tightly locked to the 100-kyr eccentricity cycle. This also explains why a simple rule (subsection 5.13) is so successful. Obviously, the situation would be completely different if the durations of individual glacial cycles were a random alteration of 2 or 3 obliquity cycles, as has been proposed by other workers.

*I. 960: it is quite clear what the author means here, but perhaps the semantics could be polished ( "simply by a non-linear response" , "an arbitrary non-linear response", "a very special type of non-linearity"). Perhaps there is a way to nail it a bit more explicitly. The key point is that a linear response (or weakly non-linear) response to a non-linear transformation of the orbital forcing will generate all the eccentricity spectrum, including its 100ka, 400ka and even longer components, simply because it will merely rectify the signal. What we need is a strongly non-linear internal dynamics, that is, internal feedbacks (or, to put it otherwise: dynamical mechanisms) which are triggered by the internal state of the system. Perhaps one could contrast 'non-linear dynamics' to 'non-linear response' but I concede that this is not quite satisfactory either.*

The appearance of all eccentricity frequencies in the system response to orbital forcing is not related to whether the response is weakly or strongly non-linear. For example, Model 3 is strongly non-linear: it has multiple equilibria and bifurcation transitions. However, without the termination regime ( $k=2$  in Eq. 2), Model 3 produces results very similar to the weakly non-linear Imbrie and Imbrie model, and the spectrum of simulated ice volume contains all eccentricity frequencies very much alike Fig. A3. Thus, modelling the 100 kyr world requires not just a strong nonlinearity but a very special type of nonlinearity. In Model 3, this very special type of nonlinearity is related to the Termination regime and explained by i) the existence of quasiperiodic forced oscillations with periodicities close to the shortest period of eccentricity, ii) an independence of the magnitude of these oscillations on the amplitude of orbital forcing; and iii) a weak sensitivity of the timing of glacial terminations on the amplitude of orbital forcing. As far as a discussion of internal feedback and other “dynamical mechanisms” is concerned, it is not applicable to Model 3, which only describes the mathematics of glacial cycles. The physics of glacial cycles is described in the next section, Section 5, where I discuss in detail the physical processes and feedbacks related to the entire glacial cycles and specifically to the termination regime (the domino effect).

### About Model 3

330 *There is one fundamental difficulty with many conceptual Quaternary ice sheet models, and, admittedly, many low-order ice sheet models (include from this reviewer, see Martínez Montero et al. 2022): why would the ice volume derivative be proportional to its volume?*

I guess it shouldn't. At least in my models, unlike V18, I do not assume that ice volume derivation  $dv/dt$  is proportional to ice volume (or ice area). In Model 3, the  $dv/dt$  term (in the glaciation regime,  $k=1$ ) depends only on the distance to the corresponding equilibrium branch, i.e.  $v-V_e$ , not  $v$ . In Model 2, which  
335 was used to derive the phase portrait for Model 3,  $dv/dt$  is related to the ice volume but in a strongly nonlinear manner since the equation for ice volume it contains a quadratic term, while in the deglaciation regime, the relationship between  $dv/dt$  and  $v$  is even more complex.

*Indeed, if we admit that mass balance is area times net accumulation rate, it would perhaps be natural to except the net accumulation rate to be proportional to climate factors, which themselves are excepted to be proportional to the \_area\_ (not volume) of the ice sheets.*  
340

The assumption that the total mass balance of the ice sheet (accumulation – ablation – calving) is proportional to the area of the ice sheet, as it is postulated in V18, does not have a solid scientific basis. The total ablation is indeed approximately proportionality to the ice sheet area, and calving is reasonably well correlated with the ice volume (Fig. 2), but the key for simulation of glacial cycles is ablation. As  
345 discussed above (see Fig. 1) there is no reason to expect that total ablation is directly related to the total ice sheet area since it strongly depends on the geographical position and the width of the ablation zone.

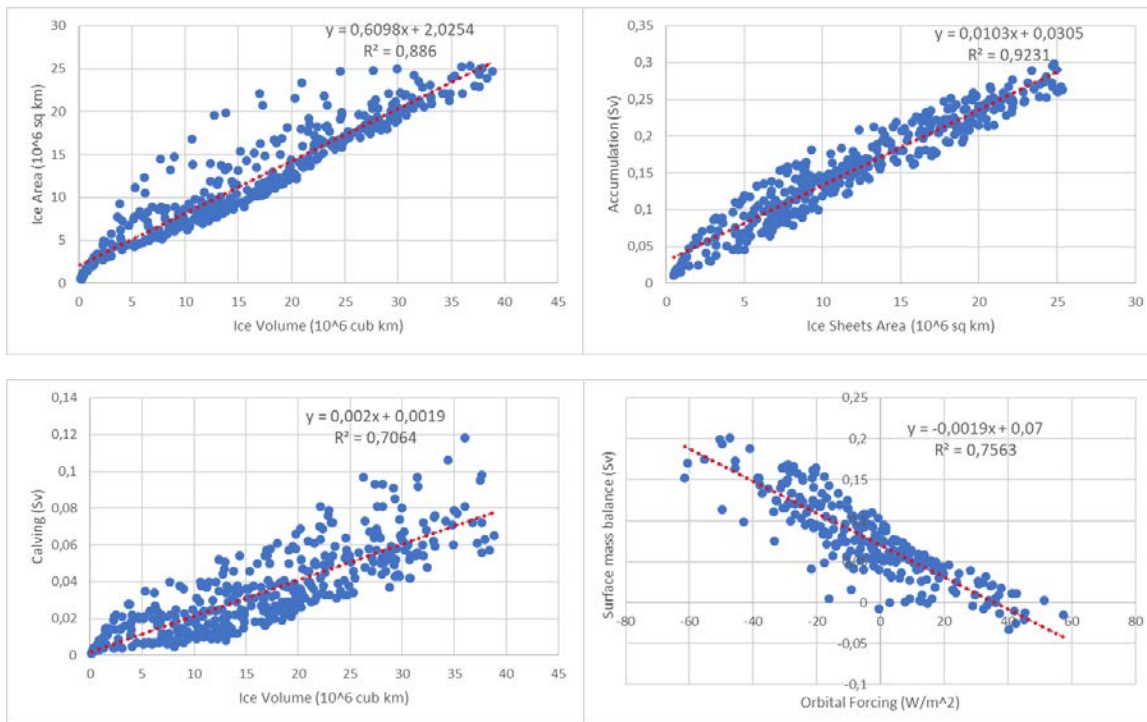

350 Fig. 2. Relationships between (top left) ice volume vs ice sheet area, (top right) ice area vs global accumulation in  $Sv=10^6$  m<sup>3</sup>/s, (bottom left) global calving vs ice volume, (bottom right) anomaly of orbital forcing vs surface mass balance derived from Ganopolski and Brovkin (2017) ONE\_1.0 experiment. Greenland ice sheet is excluded in all cases.

355 *These considerations concur to the scale relationship of Verbitsky et al. 2018 ( $dS/dt$  proportional to  $S^{3/4}$ \*accumulation,  $S$  the area). Yet, I agree, the linear relationship between bulk accumulation and volume works well in simple models, and this is perhaps why, besides its simplicity, it is so popular. The problem is briefly alluded to in Verbitsky and Crucifix, CPast 2023 (original version in <https://doi.org/10.5194/cp-2023-30>). At least there is a little theoretical challenge, here.*

360 The Referee assumes that, since the scaling relationship between volume and ice area is derived theoretically, it must be correct. In fact, this scaling relationship is only applicable to the cold-based, equilibrium ice sheets. Real ice sheets are not completely cold-based and are not in equilibrium. As a result, the simplest relationship  $A \sim V$  works better than the “theoretical”  $A \sim V^{3/4}$  most of the time (Fig. 2a), and during some (usually short) periods, neither of the two relationships really works. One example are the glacial inception, when ice area increases much faster than the ice volume (Fig. 5 in Willeit et al., 2023).

### *Interglacial metrics*

370 *The difference between eq. A1 and the original Huybers metric (l. 1034) is  $n \cdot I_0$ , where  $n$  is the number of days with  $I > I_0$ . We indeed expect this latter term to be a function of obliquity, which then cancels part of the obliquity component in the original Huybers metric. Both the Huybers original formulation, and the Milankovitch caloric insolation, work in similar ways.*

375 This statement is not correct. Caloric insolation, as any other metric for “summer insolation” obtained by integration over a certain period of time (it does not matter whether this is one day, one month or six months), contains a strong precessional component, while Huybers’ metric does not, because precession is nearly completely eliminated from this metric by varying period of integration. (Hot summers are short summers). Fig A1 in my manuscript demonstrates a clear difference between spectra of caloric half-year insolation (Fig. A1h) and Huybers’ summer insolation (Fig. A1i). It is also noteworthy that the corrected version of “integrated summer insolation”, which, in terms of Huybers and Tziperman 2008 paper, should be written as  $\sum_{d=1}^{365} \beta_d (\Phi_d - \tau)$ , contains even more precession than the caloric half-year summer insolation (Fig. A1j).

*Huybers and Tziperman 2008 are quite explicit about why they do not clip the insolation (just after their equation 2);*

385 Indeed, Huybers and Tziperman 2008 tried to justify Huybers’ original idea and wrote: “Note that the full magnitude of the insolation intensity, not only the portion above the threshold, is summed under the assumption that most incident radiative energy will eventually lead to ablation once the freezing point is obtained”. With that, they demonstrate a lack of understanding of the processes controlling the surface mass balance of ice sheets. According to such a theory, surface melt must suddenly jump from zero to a large value the next day after insolation crosses threshold value  $\tau$ . Of course, this does not happens in reality. In reality, at the time when insolation crosses this threshold, the absorbed insolation is completely compensated by the net outgoing longwave radiation plus (usually less important) sensible and latent heat fluxes. This is why only the insolation above  $\tau$  (i.e.  $\Phi_d - \tau$ ), not  $\Phi_d$ , can contribute to

snow/ice melt during the entire melt season. Thus, the day after crossing the threshold, the amount of insolation available for melting of snow/ice will be not 300 W/m<sup>2</sup> but just a few W/m<sup>2</sup>!

*I would like to bring the additional arguments:*

395 - *when we calibrate one of the good old Saltzman's models we obtained posterior distributions with about equal weights of precession and obliquity (Carson et al., 2013, Figs. 3 and 5, compare gamma\_P and gamma\_E)*

400 - *in LOVECLIM, with interglacial conditions, precession and obliquity have more or same-order-of-magnitude effects on the "GDD" (but actually equivalent to PDD) at high latitudes (Bouncer et al., 2015, Fig. 7) with, I would concede, more precession in North America.*

Are these arguments in defence of “integrated summer insolation”? But they obviously do not serve this purpose. The Referee wrote that orbital forcing contains comparable contributions of precession and obliquity, and I agree with that. As Fig. A1 in my paper shows, all metrics for summer insolation, including the corrected version of “integrated summer insolation” contain both strong obliquity and precessional components. Only Huybers’ version of “integrated summer insolation” contains practically no precession. This is precisely the reason why Huybers published this metric, since in the early 2000s, he denied the important role of precession in glacial cycles and speculated that “*the ice sheets terminated every second or third obliquity cycle at times of high obliquity*” (Huybers and Wunsch, 2005).

410 *So the discussion clearly has merit and the author is undoubtedly right in tackling this issue, but perhaps the conclusion lines 1046 deserve some caveat.*

Although I put the discussion of “integrated summer insolation” in the Appendix, I believe this is an important issue for two reasons:

1) If “integrated summer insolation” has a physical meaning, then it would represent an elegant solution for the “41-kyr world problem”, namely, the lack of precessional signal in paleorecords prior to MPT. However, because “integrated summer insolation” is a wrong metric for summer insolation, and all “right” metrics contain strong precession, the 41-kyr problem remains. In particular, in Willeit et al. (2019) simulated ice volume prior to MPT, although is dominated by obliquity, but still contains precessional component.

2) The motivation for Huybers’ 2006 paper is clear: he was looking for a metric which does not contain precession and found one. Unfortunately, he made a mistake. Everybody can make a mistake. However, the fact that some workers still use this wrong metric is worrisome.

This is why I see no reason to “soften” the conclusion of Appendix 1.

### ***The Domino effect***

425 *Such a domino effect is indeed what is encoded, more or less explicitly, in many conceptual models, but how 'irreversible' or 'catastrophic' the domino needs to be is not straightforward. Some deglaciations are deeper than others, or sometimes stalled (those leading to 7e, or the strange 15c/15 a duet) which conceptual models tend to overdo.*

430 The complete deglaciation (i.e. final  $v=0$ ) for simplicity is encoded only in Model 3 but not in Model 2. In particular, Model 2 correctly simulates “incomplete” deglaciations (without any parameter changes)

during several pre-MBE interglacials (Fig. A5). Actually, with complex models, it is easier to get incomplete rather than complete deglaciations. In any case, “completeness” or “incompleteness” of deglaciations (whatever it means) has nothing to do with the concept of the domino effect: some ice always remained on the Earth during the Quaternary.

435 Brovkin, V., Ganopolski, A., Archer, D., and Rahmstorf, S.: Lowering of glacial atmospheric CO<sub>2</sub> in response to changes in oceanic circulation and marine biogeochemistry, *Paleoceanography*, 22, PA4202, 2007.

Willeit, M., Calov, R., Talento, S., Greve, R., Bernales, J., Klemann, V., Bagge, M. and Ganopolski, A.: Glacial inception through rapid ice area increase driven by albedo and vegetation feedbacks. *EGUsphere*, 1-41, 2023.
